# Supplementary material
Source: PubMed Central journal article supplement (PMC6202215)

# Graphic Abstract

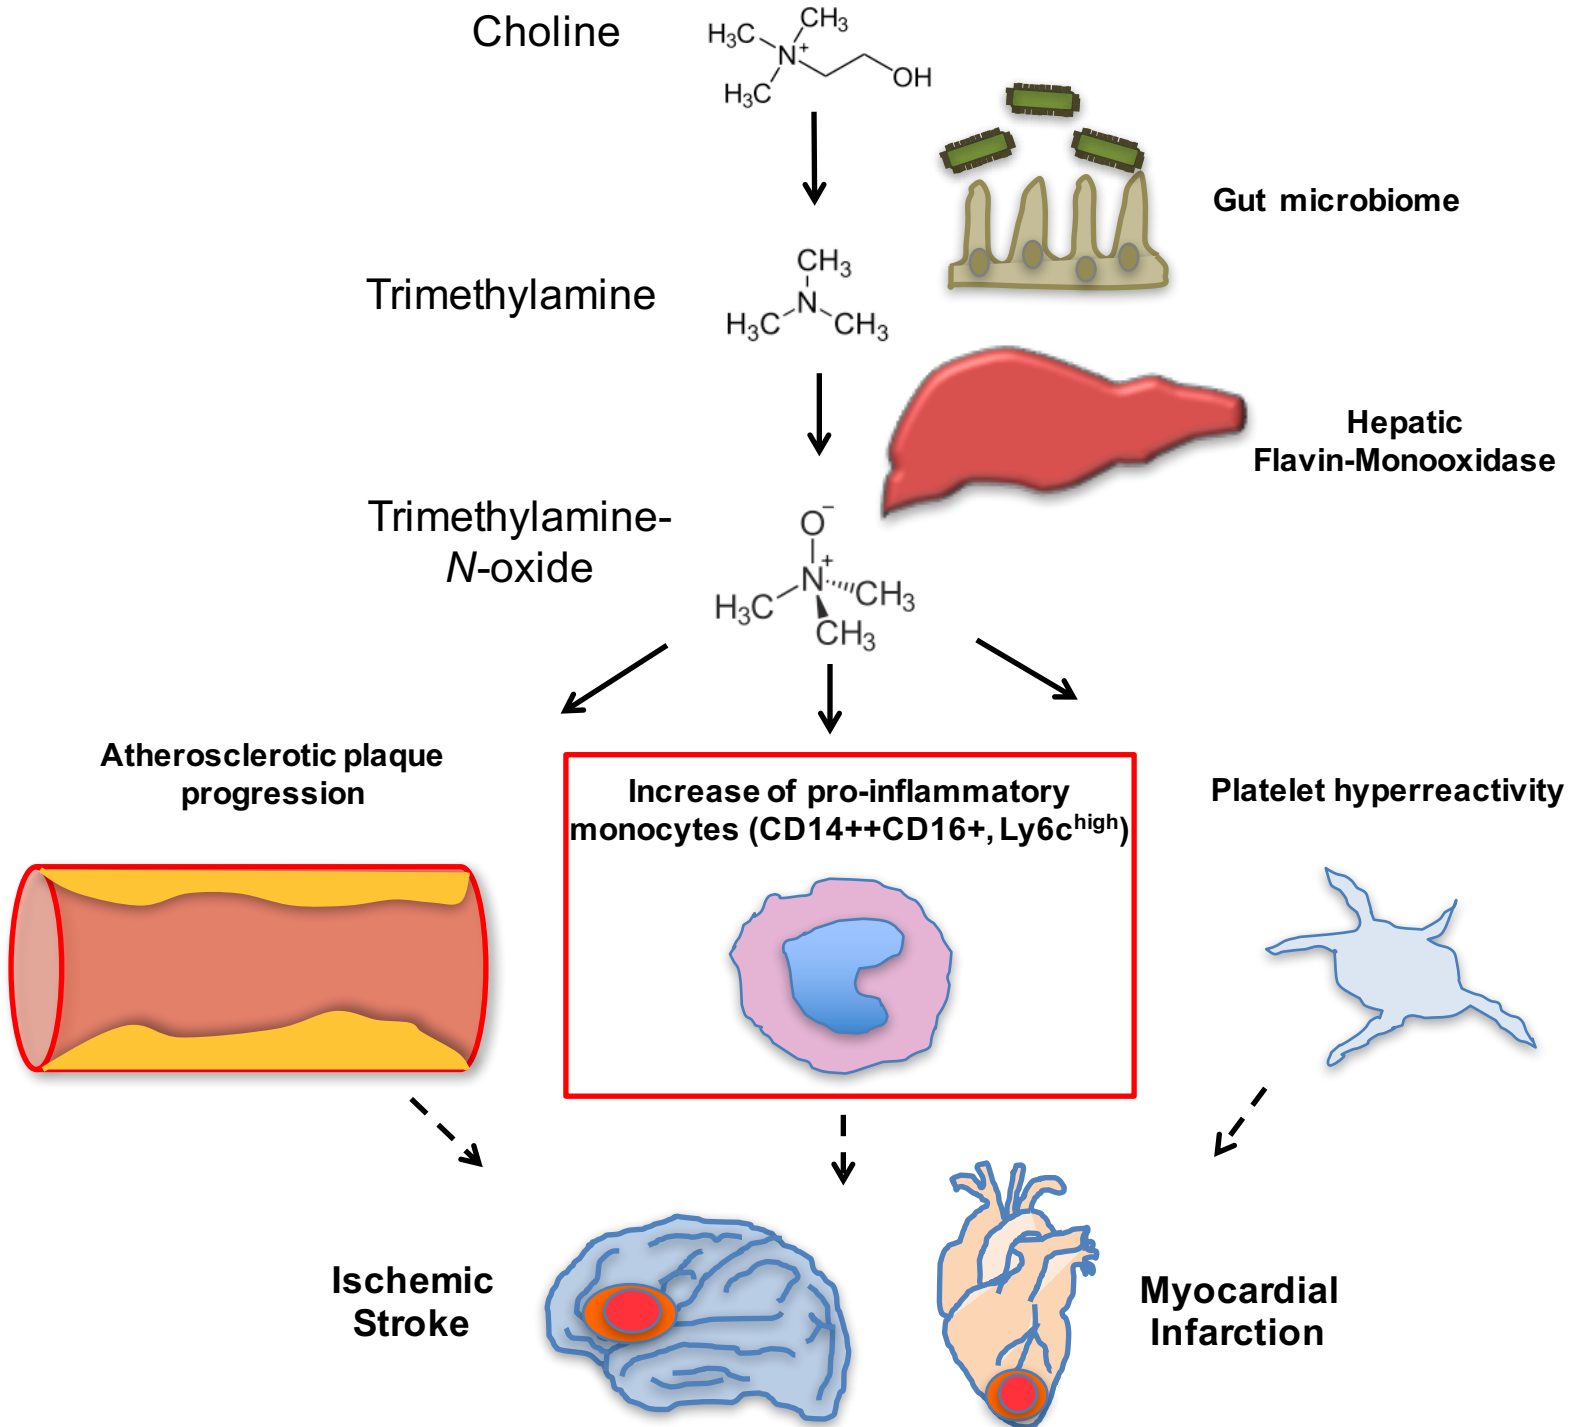

Supplement: NIHMS977832-supplement-Graphic_Abstract.pdf [file NIHMS977832-supplement-Graphic_Abstract.pdf]
